# Supplementary material
Source: PubMed Central journal article supplement (PMC2849458)
Supplement: supp_192_8_2220__1.pdf [file supp_192_8_2220__1.pdf]

## SUPPLEMENTARY INFORMATION

**Table S1.** Bacterial strains and plasmids used in this study

| Name                                             | Description                                                                                                                                                                                                                                                                                                               | Source/ reference |
|--------------------------------------------------|---------------------------------------------------------------------------------------------------------------------------------------------------------------------------------------------------------------------------------------------------------------------------------------------------------------------------|-------------------|
| <u>Strains</u>                                   |                                                                                                                                                                                                                                                                                                                           |                   |
| <i>Yeast</i>                                     |                                                                                                                                                                                                                                                                                                                           |                   |
| AH109                                            | <i>HIS3, ADE2, lacZ, MEL1</i> containing reporter strain for screening protein interactions, <i>MATa, trp1-901, leu2-3, 112, ura3-52, his3-200, gal4Δ, gal80Δ, LYS2::GAL1<sub>UAS</sub>-GAL1<sub>TATA</sub>-HIS3, MEL1 GAL2<sub>UAS</sub>-GAL2<sub>TATA</sub>-ADE2, URA3::MEL1<sub>UAS</sub>-MEL1<sub>TATA</sub>-lacZ</i> | Clontech          |
| Y187                                             | <i>lacZ, MEL1</i> containing reporter strain, <i>MATa, ura3-52, his3-200, ade 2-101, trp 1-901, leu 2-3, 112, gal4Δ, mef, gal80Δ, URA3::GAL1<sub>UAS</sub>.GAL1<sub>TATA</sub>-lacZ, MEL1</i>                                                                                                                             | Clontech          |
| <i>M. smegmatis</i>                              |                                                                                                                                                                                                                                                                                                                           |                   |
| mc <sup>2</sup> 155                              | Laboratory stock of <i>ept</i> mutant of mc <sup>2</sup> 6                                                                                                                                                                                                                                                                | (11)              |
| HIS5T                                            | Derivative of mc <sup>2</sup> 155 carrying a +1 (4T→5T) frameshift mutation at codon 205 in the <i>hisD</i> gene resulting in histidine auxotrophy                                                                                                                                                                        | This work         |
| HIS5T (pOLYGaa)                                  | Derivative of HIS5T carrying pOLYGaa; Hyg <sup>r</sup>                                                                                                                                                                                                                                                                    | This work         |
| HIS5T(pGaaDinB1)                                 | Derivative of HIS5T carrying pGaaDinB1; Hyg <sup>r</sup>                                                                                                                                                                                                                                                                  | This work         |
| HIS5T(pGaaDinB2)                                 | Derivative of HIS5T carrying pGaaDinB2; Hyg <sup>r</sup>                                                                                                                                                                                                                                                                  | This work         |
| <i>M. tuberculosis</i>                           |                                                                                                                                                                                                                                                                                                                           |                   |
| H37Rv                                            | Laboratory strain (ATCC 25618)                                                                                                                                                                                                                                                                                            | Laboratory stock  |
| <i>dinB1::hyg</i>                                | Derivative of H37Rv harboring <i>hyg</i> -marked insertion mutation in <i>dinB1</i> ; Hyg <sup>r</sup>                                                                                                                                                                                                                    | This work         |
| <i>dinB1::hyg attB::dinB1</i>                    | Derivative of <i>dinB1::hyg</i> carrying pMDINB1 integrated at the <i>attB</i> site; Hyg <sup>r</sup> , Km <sup>r</sup>                                                                                                                                                                                                   | This work         |
| $\Delta$ <i>dinB2</i>                            | Derivative of H37Rv harboring an out-of-frame, unmarked deletion mutation in <i>dinB2</i> encoding the first 13 amino acids of DinB2                                                                                                                                                                                      | This work         |
| $\Delta$ <i>dinB2 attB::dinB2</i>                | Derivative of $\Delta$ <i>dinB2</i> carrying pMDINB2 integrated at the <i>attB</i> site; Hyg <sup>r</sup>                                                                                                                                                                                                                 | This work         |
| $\Delta$ <i>dinB1::hyg</i> $\Delta$ <i>dinB2</i> | Derivative of <i>dinB1::hyg</i> harboring an unmarked deletion mutation in <i>dinB2</i> ; Hyg <sup>r</sup>                                                                                                                                                                                                                | This work         |
| <u>Plasmids</u>                                  |                                                                                                                                                                                                                                                                                                                           |                   |
| pMV306K                                          | <i>E. coli</i> -Mycobacterium integrating shuttle vector; Km <sup>r</sup>                                                                                                                                                                                                                                                 | (6)               |
| pMV306H                                          | <i>E. coli</i> -Mycobacterium integrating shuttle vector; Hyg <sup>r</sup>                                                                                                                                                                                                                                                | H. Boshoff        |
| p2NIL                                            | <i>E. coli</i> cloning vector; Km <sup>r</sup>                                                                                                                                                                                                                                                                            | (10)              |

|           |                                                                                                                                                                                                                                                                                                                                                       |           |
|-----------|-------------------------------------------------------------------------------------------------------------------------------------------------------------------------------------------------------------------------------------------------------------------------------------------------------------------------------------------------------|-----------|
| pGOAL17   | Plasmid carrying <i>lacZ-sacB</i> markers as a <i>PacI</i> cassette; Ap <sup>r</sup>                                                                                                                                                                                                                                                                  | (10)      |
| pOLYG     | Multicopy <i>E. coli-Mycobacterium</i> shuttle vector; Hyg <sup>r</sup>                                                                                                                                                                                                                                                                               | (8)       |
| pAGAN11   | Plasmid carrying a 4152-bp <i>BamHI</i> acetamidase fragment from <i>M. smegmatis</i>                                                                                                                                                                                                                                                                 | (9)       |
| pOLYGaa   | Derivative of pOLYG carrying the <i>M. smegmatis</i> acetamidase fragment from pAGAN11; Hyg <sup>r</sup>                                                                                                                                                                                                                                              | This work |
| pGaaDinB1 | Derivative of pOLYGaa carrying the MTB <i>dinB1</i> ORF, cloned as a 1472-bp fragment amplified with primers dinB1F and dinB1R (Table S2), and inserted downstream of the acetamidase fragment; Hyg <sup>r</sup>                                                                                                                                      | This work |
| pGaaDinB2 | Derivative of pOLYGaa carrying the MTB <i>dinB2</i> ORF, cloned as a 1091 bp fragment amplified with primers dinB2F and dinB2R (Table S2), and inserted downstream of the acetamidase fragment; Hyg <sup>r</sup>                                                                                                                                      | This work |
| pDINB1KO  | Knockout vector for creating insertion mutation in <i>dinB1</i> – p2NIL subclone carrying <i>dinB1::hyg</i> allele ( <i>hyg</i> gene insertion at <i>PvuII</i> site in <i>dinB1</i> with 2546 bp of 5'-flanking and 1509 bp of 3'-flanking homologous sequence) and <i>lacZ-sacB</i> marker cassette from pGOAL17; Km <sup>r</sup> , Hyg <sup>r</sup> | This work |
| pDINB2KO  | Knockout vector for creating out-of-frame deletion mutation in <i>dinB2</i> – p2NIL subclone carrying the $\Delta$ <i>dinB2</i> allele (Table S2) and <i>lacZ-sacB</i> cassette from pGOAL17; Km <sup>r</sup>                                                                                                                                         | This work |
| pMDINB1   | <i>dinB1</i> complementation vector – pMV306K carrying a 2717 bp <i>KpnI</i> fragment containing <i>dinB1</i> , 1266 bp of upstream sequence (212 bp upstream of <i>dinB1</i> and 1054 bp of the 3'-end of <i>ileS</i> ) and 96 bp of downstream sequence (3'-end of <i>ansA</i> ); Km <sup>r</sup>                                                   | This work |
| pMDINB2   | <i>dinB2</i> complementation vector – pMV306H carrying a 1835 bp <i>EcoRV</i> fragment containing <i>dinB2</i> and 792 bp of 5'-flanking sequence (Rv3055 and a further 167 bp) and 3 bp of 3'-flanking sequence; Hyg <sup>r</sup>                                                                                                                    | This work |
| pGHISD5T  | Derivative of pGEM3Z(+) <sup>r</sup> carrying a 1132-bp fragment amplified with HISF and HISR into which the <i>hisD</i> frameshift mutation was introduced using the mutagenic primer, HISM (Table S2)                                                                                                                                               | This work |
| pHISD5T   | Suicide vector for transferring the +1 frameshift mutation ( <i>hisD5T</i> ) into <i>M. smegmatis hisD</i> at codon 205 – p2NIL subclone derived from pGHISD5T and carrying the <i>hisD5T</i> allele on a 796-bp <i>PstI-BamHI</i> fragment and the <i>lacZ-sacB</i> cassette from pGOAL17; Km <sup>r</sup>                                           | This work |
| pGADT7    | Y2H vector to produce AD fusions, <i>GAL4</i> <sub>(768-881)</sub> AD, <i>LEU2</i> , HA epitope tag; Ap <sup>r</sup>                                                                                                                                                                                                                                  | Clontech  |
| pGBKT7    | Y2H vector to produce BD fusions, <i>GAL4</i> <sub>(1-147)</sub> DNA-BD, <i>TRP1</i> , c-MYC epitope tag; Km <sup>r</sup>                                                                                                                                                                                                                             | Clontech  |
| pGADDinB1 | pGADT7 containing DinB1 ORF fused to <i>GAL4</i> AD                                                                                                                                                                                                                                                                                                   | This work |
| pGADDinB2 | pGADT7 containing DinB2 ORF fused to <i>GAL4</i> AD                                                                                                                                                                                                                                                                                                   | This work |
| pGADDnaE1 | pGADT7 containing DnaE1 ORF fused to <i>GAL4</i> AD                                                                                                                                                                                                                                                                                                   | This work |
| pGADDnaE2 | pGADT7 containing DnaE2 ORF fused to <i>GAL4</i> AD                                                                                                                                                                                                                                                                                                   | This work |
| pGADDnaN  | pGADT7 containing DnaN ORF fused to <i>GAL4</i> AD                                                                                                                                                                                                                                                                                                    | This work |
| pGBDDinB1 | pGBKT7 containing DinB1 ORF fused to <i>GAL4</i> BD                                                                                                                                                                                                                                                                                                   | This work |
| pGBDDinB2 | pGBKT7 containing DinB2 ORF fused to <i>GAL4</i> BD                                                                                                                                                                                                                                                                                                   | This work |
| pGBDDnaE1 | pGBKT7 containing DnaE1 ORF fused to <i>GAL4</i> BD                                                                                                                                                                                                                                                                                                   | This work |
| pGBDDnaE2 | pGBKT7 containing DnaE2 ORF fused to <i>GAL4</i> BD                                                                                                                                                                                                                                                                                                   | This work |
| pGBDDnaN  | pGBKT7 containing DnaN ORF fused to <i>GAL4</i> BD                                                                                                                                                                                                                                                                                                    | This work |

**Table S2.** PCR primers, others oligonucleotides and amplicons used in this study

| Name | Sequence (5'-3') <sup>a</sup>            | Application                                                                                                                 | Amplicon properties/ region targeted/ references                                                                                                                            |
|------|------------------------------------------|-----------------------------------------------------------------------------------------------------------------------------|-----------------------------------------------------------------------------------------------------------------------------------------------------------------------------|
| PPF1 | GGCC <u>CTGCAGC</u> GCCTTGATGCGATCGGGGCG | Forward primer used to amplify 5'-flanking homologous segment used for construction of pDINB2KO                             | 2014 bp amplicon extending from the 3'-end of MTB <i>nrdH</i> (Rv3053c) and containing 35 bp of the 5'-end of <i>dinB2</i> (Rv3056)                                         |
| PPR1 | GCGC <u>AGATCT</u> ACGTGCAGGATCCATCGCGG  | Reverse primer used to amplify 5'-flanking homologous segment used for construction of pDINB2KO                             |                                                                                                                                                                             |
| PPF3 | CCGGG <u>GATCC</u> GGTTGCTGGGAGTGCGG     | Forward primer used to amplify 3'-flanking homologous segment used for construction of pDINB2KO                             | 1961 bp amplicon containing 32 bp of the 3' end of MTB <i>dinB2</i> (Rv3056) and extending to the 5'-end of Rv3059 ( <i>cyp136</i> )                                        |
| PPR3 | GCGCC <u>AAGCTT</u> GAGCCCGCTGCCTGGCG    | Reverse primer used to amplify 3'-flanking homologous segment used for construction of pDINB2KO                             |                                                                                                                                                                             |
| HISF | CGCGCCGCGCTGCAGGTCTCCATCGACCG            | Forward primer used to amplify internal segment of <i>M. smegmatis hisD</i> gene                                            | 1132 bp amplicon extending from base position 271 the <i>M. smegmatis hisD</i> gene to 78 bp downstream of the stop codon. Used to construct the vector pGHISD5T (Table S1) |
| HISR | CTGCAGTACGGCGACTTGCCCCGC                 | Reverse primer used to amplify internal segment of <i>M. smegmatis hisD</i> gene                                            |                                                                                                                                                                             |
| HISM | GGCCGTGGCGCTTT <u>TT</u> TGGCCTACGGCGGC  | Mutagenic primer for the introduction of a +1 frameshift mutation (4T→5T) at codon 205 of the <i>M. smegmatis hisD</i> gene | Position 600-627 in <i>M smegmatis hisD</i>                                                                                                                                 |
| B1F2 | AGCGCTTCTCAGCGGATT                       | PCR primers for quantitative detection of MTB <i>dinB1</i> gene expression                                                  | Position 504-648 in MTB <i>dinB1</i>                                                                                                                                        |
| B1R2 | GTCGCGCCTAGGATGTTG                       |                                                                                                                             |                                                                                                                                                                             |
| B2F2 | CGTACCGTCTGAAGCACTGT                     | PCR primers for quantitative detection of MTB <i>dinB2</i> gene expression                                                  | Position 544-780 in MTB <i>dinB2</i>                                                                                                                                        |
| B2R  | GAGGTCTCGTGGAAAGGTGA                     |                                                                                                                             |                                                                                                                                                                             |
| E1HF | CGTGTGACTCCACCTTGTTGA                    | PCR primers for quantitative detection of                                                                                   | Position 845-903 in MTB <i>dnaE1</i> (1)                                                                                                                                    |

|        |                          |                                                                            |                                                  |
|--------|--------------------------|----------------------------------------------------------------------------|--------------------------------------------------|
| E1HR   | TGTCCACACGTCGGCG         | MTB <i>dnaE1</i> gene expression                                           |                                                  |
| E2F2   | GGCGGTGTATGAGATGCTG      | PCR primers for quantitative detection of MTB <i>dnaE2</i> gene expression | Position 1842-2060 in MTB <i>dnaE2</i>           |
| E2R2   | GACGGGTGCTCGTAGATGAC     |                                                                            |                                                  |
| SigAF  | TGCAGTCGGTGCTGGACAC      | PCR primers for quantitative detection of MTB <i>sigA</i> gene expression  | Position 1379-1573 in MTB <i>sigA</i> (3)        |
| SigAR  | CGCGCAGGACCTGTGAGCGG     |                                                                            |                                                  |
| SMB1F  | GACGTCGAGGCGTTCTGT       | PCR primers for detection of <i>M. smegmatis dinB1</i> gene expression     | Position 331-430 in <i>M. smegmatis dinB1</i>    |
| SMB1R  | TCTTGCGGATCTGTTTACCC     |                                                                            |                                                  |
| SMB2F  | GGGATCAGTGACAACAAGCA     | PCR primers for detection of <i>M. smegmatis dinB2</i> gene expression     | Position 427-526 in <i>M. smegmatis dinB2</i>    |
| SMB2R  | CCATCACCGTCATCCAGTTC     |                                                                            |                                                  |
| SMSigF | GGGCGTGATGTCCATCTCCT     | PCR primers for detection of <i>M. smegmatis sigA</i> gene expression      | Position 367-488 in <i>M. smegmatis sigA</i> (7) |
| SMSigR | GTATCCCGGTGCATGGTC       |                                                                            |                                                  |
| B1RT2  | TAGCTTCACCGTGATGGTG      | Reverse primer used for cDNA synthesis                                     | Position 844-861 in MTB <i>dinB1</i>             |
| B2RT2  | GGGTGACGGTTCGCGACG       | Reverse primer used for cDNA synthesis                                     | Position 851-868 in MTB <i>dinB2</i>             |
| E1RT   | GGCGACGATCAGAAAGTACG     | Reverse primer used for cDNA synthesis                                     | Position 1076-1095 in MTB <i>dnaE1</i>           |
| E2RT2  | AAAGCCGGCGCAGTCGAC       | Reverse primer used for cDNA synthesis                                     | Position 2128-2145 in MTB <i>dnaE2</i>           |
| SigART | CTGACATGGGGGCCCGCTACGTTG | Reverse primer used for cDNA synthesis                                     | Position 20-43 downstream of MTB <i>sigA</i>     |
| RpoBF2 | GAGGGTCAGACCACGATGAC     | Forward primer for amplification of RRDR in <i>rpoB</i>                    | Position 1030-1478 in MTB <i>rpoB</i>            |
| RpoBR2 | GAGCCGATCAGACCGATGT      | Reverse primer for amplification of RRDR in <i>rpoB</i>                    | Position 1460-1478 in MTB <i>rpoB</i>            |
| RpoBS  | GCAGACGTTGATCAACATCC     | Internal primer for sequencing RRDR in <i>rpoB</i>                         | Position 1224-1243 in MTB <i>rpoB</i>            |

---

|        |                                                    |                                                                                       |                                                                                                    |
|--------|----------------------------------------------------|---------------------------------------------------------------------------------------|----------------------------------------------------------------------------------------------------|
| dinB1F | GGGGG <u>GATATCG</u> CCATAGCGAAA <u>ACTAGCTCG</u>  | Forward primer used to amplify the MTB <i>dinB1</i> ORF for construction of pGaaDinB1 | 1472 bp amplicon extending from 65 bp upstream of the 5'-end of MTB <i>dinB1</i> to the stop codon |
| dinB1R | CCCCC <u>TATAGTGG</u> CCAGCGGCTGCAGTAG             | Reverse primer used to amplify the MTB <i>dinB1</i> ORF for construction of pGaaDinB1 |                                                                                                    |
| dinB2F | GGGGG <u>GATATCG</u> AAA <u>ACTGTG</u> CGGACGATGAT | Forward primer used to amplify the MTB <i>dinB2</i> ORF for construction of pGaaDinB2 | 1091 bp amplicon extending from 30 bp upstream of the 5'-end of MTB <i>dinB2</i> to the stop codon |
| dinB2R | CCCCC <u>TATAGATCC</u> GGTCAAGATTGGCGTGA           | Reverse primer used to amplify the MTB <i>dinB2</i> ORF for construction of pGaaDinB2 |                                                                                                    |

---

a. Restriction sites or additional bases engineered into primer sequences are underlined



DinB1 in the *dinB1::hyg* mutant strain in which the thumb and little finger domains that are required for binding to the minor and major grooves of DNA, respectively, are disrupted. The annotation of these domains is derived from the crystal structure of the DinB homologue in *Sulfolobus solfataricus*, Dpo4 (5), and the little finger domain of *E. coli* PolIV (2). NCBI accession or genome annotation numbers are given in parentheses.

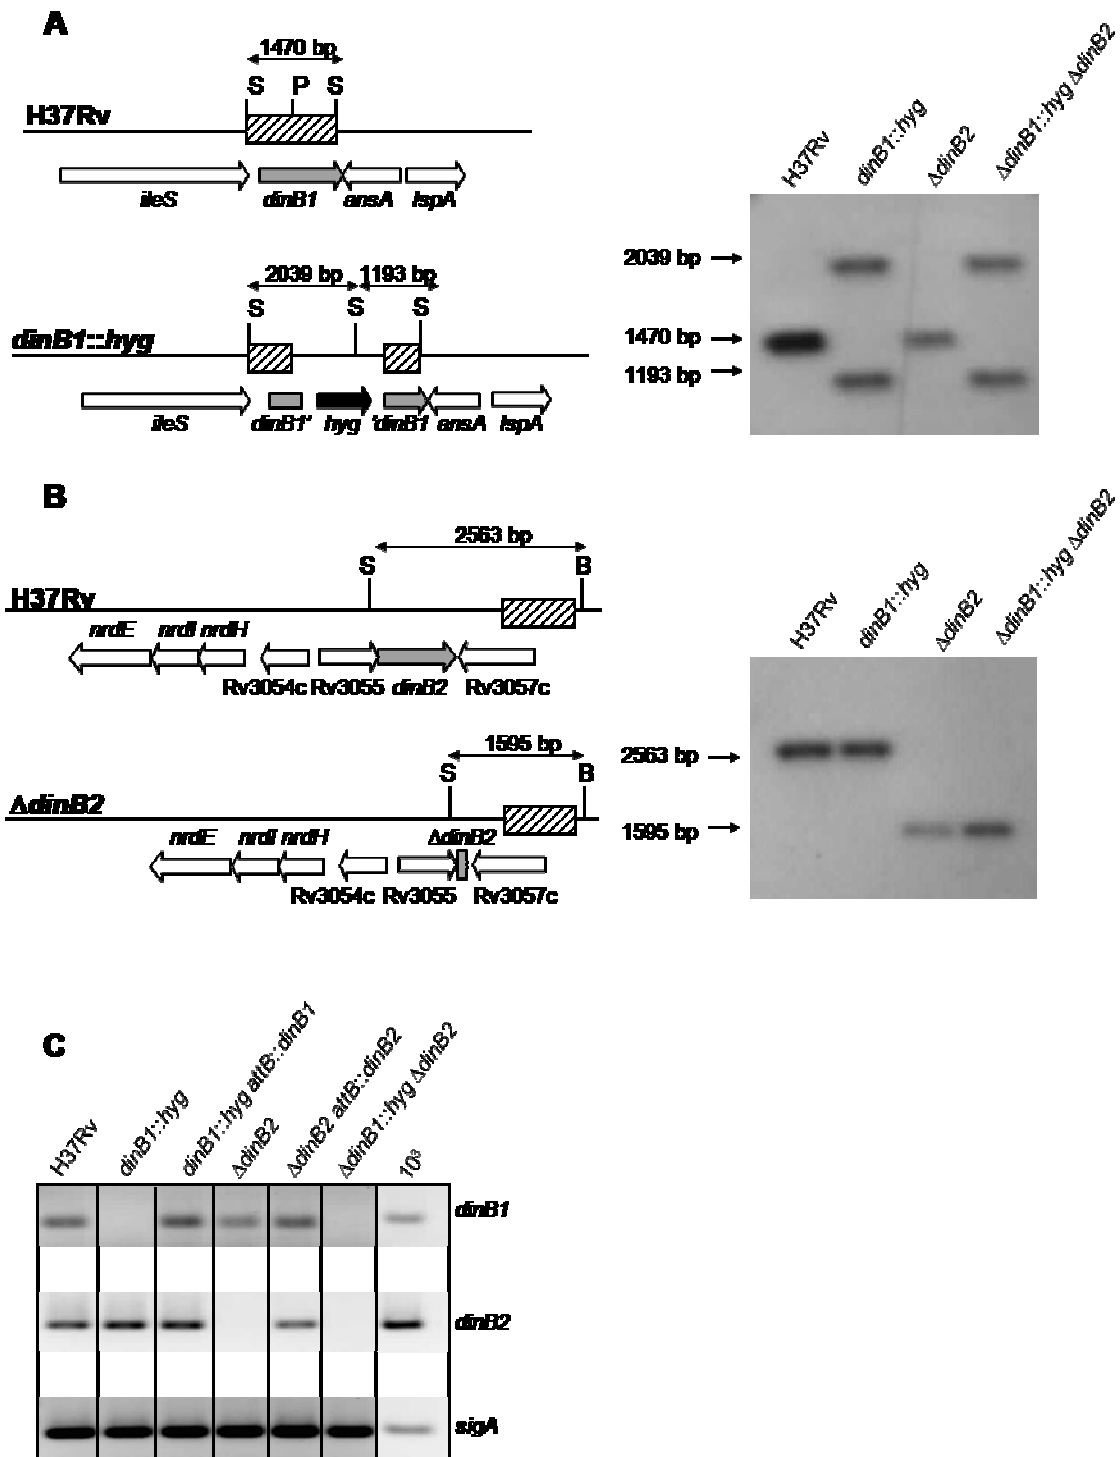

**Figure S2.** Construction and genotypic characterization of allelic exchange mutants of MTB. Restriction maps of regions carrying *dinB1* and *dinB1::hyg* (A) and *dinB2* and  $\Delta$ *dinB2* (B) alleles in MTB H37Rv (not to scale). The *dinB1* gene was inactivated by insertion of a *hyg* marker at a *Pvu*II site located 598 bp downstream of the *dinB1* start codon, thus disrupting the *dinB1* ORF between the Gln200 and Leu201 codons (Fig. S1). The *dinB2* gene was inactivated by deletion of an internal 974-bp segment of this gene, resulting in the formation of an out-of-frame deletion mutation,  $\Delta$ *dinB2*, encoding only the first 13 amino



acids of DinB2 (Table S1). The  $\Delta$ *dinB2* mutation was introduced into the *dinB1::hyg* mutant to produce a double mutant strain. Genomic DNA was digested with *SalI* (A) or *BglII/SalI* (B) and Southern blotting carried out as described previously (4) probing with fragments denoted by hatched boxes. P, *PvuII*; S, *SalI*.; B, *BglII*. (C) RT-PCR analysis of *dinB1* and *dinB2* expression in MTB using mRNA isolated from cells grown to mid-logarithmic phase.

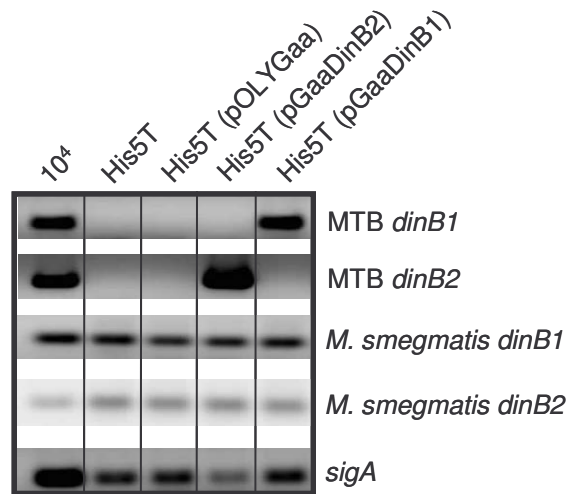

**Figure S3.** RT-PCR analysis of MTB *dinB1* and *dinB2* expressed ectopically in *M. smegmatis*. Expression analysis was conducted using mRNA isolated from bacteria grown to mid-logarithmic phase in Middlebrook 7H9 media supplemented with 0.2% glycerol, 0.085% NaCl, 0.2% glucose and 0.05% Tween 80. For strains carrying vectors, hygromycin was added to a final concentration of 50 µg/ml. In this experiment, no acetamide inducer was added to the cultures. RT-PCR was carried out using the primers described in Table S2. For comparison, *M. smegmatis* *dinB1*, *dinB2* and *sigA* transcripts were analyzed in the same samples alongside a genomic DNA control (first lane).

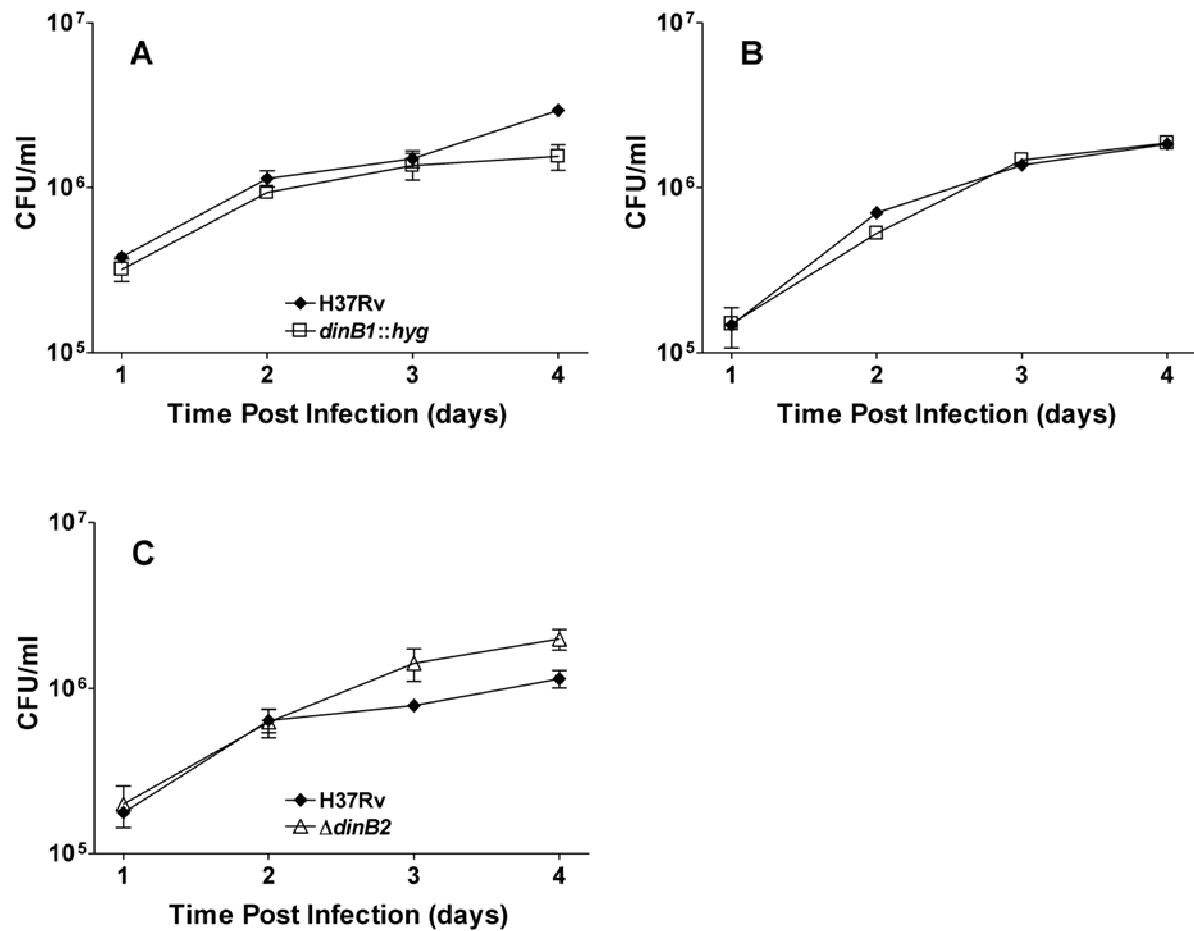

**Figure S4.** Intracellular growth of the DinB1 and DinB2 mutant strains of MTB. (A) Growth of the *dinB1::hyg* mutant in resting human peripheral blood-derived monocytes (PBMcs) PBMcs. (B) Growth of the *dinB1::hyg* mutant in LPS activated PBMcs. (C) Growth of the  $\Delta$ *dinB2* mutant in LPS activated PBMcs from a different donor.  $\blacklozenge$ , Wild-type H37Rv;  $\square$ , *dinB1::hyg*;  $\Delta$ ,  $\Delta$ *dinB2*.

## REFERENCES

1. **Boshoff, H. I., M. B. Reed, C. E. Barry, 3rd, and V. Mizrahi.** 2003. DnaE2 polymerase contributes to in vivo survival and the emergence of drug resistance in *Mycobacterium tuberculosis*. *Cell* **113**:183-93.
2. **Bunting, K. A., S. M. Roe, and L. H. Pearl.** 2003. Structural basis for recruitment of translesion DNA polymerase Pol IV/DinB to the beta-clamp. *EMBO J* **22**:5883-92.
3. **Dawes, S. S., D. F. Warner, L. Tsenova, J. Timm, J. D. McKinney, G. Kaplan, H. Rubin, and V. Mizrahi.** 2003. Ribonucleotide reduction in *Mycobacterium tuberculosis*: function and expression of genes encoding class Ib and class II ribonucleotide reductases. *Infect Immun* **71**:6124-31.
4. **Gordhan, B. G., S. J. Andersen, A. R. De Meyer, and V. Mizrahi.** 1996. Construction by homologous recombination and phenotypic characterization of a DNA polymerase domain polA mutant of *Mycobacterium smegmatis*. *Gene* **178**:125-30.
5. **Ling, H., F. Boudsocq, R. Woodgate, and W. Yang.** 2001. Crystal structure of a Y-family DNA polymerase in action: a mechanism for error-prone and lesion-bypass replication. *Cell* **107**:91-102.
6. **Mdluli, K., D. R. Sherman, M. J. Hickey, B. N. Kreiswirth, S. Morris, C. K. Stover, and C. E. Barry, 3rd.** 1996. Biochemical and genetic data suggest that InhA is not the primary target for activated isoniazid in *Mycobacterium tuberculosis*. *J Infect Dis* **174**:1085-90.
7. **Mowa, M. B., D. F. Warner, G. Kaplan, B. D. Kana, and V. Mizrahi.** 2009. Function and regulation of class I ribonucleotide reductase-encoding genes in mycobacteria. *J Bacteriol* **191**:985-95.
8. **O'Gaora, P., S. Barnin, C. Hayward, E. Filley, G. Rook, D. Young, and J. Thole.** 1997. Mycobacteria as immunogens: development of expression vectors for use in multiple mycobacterial species. *Med. Princ. Prac* **6**:91-96.
9. **Parish, T., E. Mahenthiralingam, P. Draper, E. O. Davis, and M. J. Colston.** 1997. Regulation of the inducible acetamidase gene of *Mycobacterium smegmatis*. *Microbiology* **143 ( Pt 7)**:2267-76.
10. **Parish, T., and N. G. Stoker.** 2000. Use of a flexible cassette method to generate a double unmarked *Mycobacterium tuberculosis tlyA plcABC* mutant by gene replacement. *Microbiology* **146 ( Pt 8)**:1969-75.
11. **Snapper, S. B., R. E. Melton, S. Mustafa, T. Kieser, and W. R. Jacobs, Jr.** 1990. Isolation and characterization of efficient plasmid transformation mutants of *Mycobacterium smegmatis*. *Mol Microbiol* **4**:1911-9.
